# Supplementary material for: CaWRKY30 Positively Regulates Pepper Immunity by Targeting CaWRKY40 against Ralstonia solanacearum Inoculation through Modulating Defense-Related Genes
Source: MDPI journal article supplement (doi:10.3390/ijms222112091), 2021-11-08
Supplement: s1 [file s1]

# CaWRKY30 Positively Regulates Pepper Immunity by Targeting CaWRKY40 against *Ralstonia solanacearum* Inoculation through Modulating Defense-related Genes

Ansar Hussain<sup>1</sup>, Muhammad Ifnan Khan <sup>1</sup>, Shahzadi Mahpara <sup>1</sup>, Ijaz Rasool Noorka <sup>1</sup>, Mohamed A. A. Ahmed <sup>2</sup>, Abdullah M. Al-Sadi <sup>3</sup>, Bandar S. Aljuaid <sup>4</sup>, Ahmed M. El-Shehawi <sup>4</sup>, Zhiqin Liu <sup>5,\*</sup>, Shahid Farooq <sup>6</sup>, Ali Tan Kee Zuan <sup>7, \*</sup>

<sup>1</sup> Department of Plant Breeding and Genetics, Ghazi University, Dera Ghazi Khan 32200, Pakistan; mifnan@yahoo.com (MIK); aazizwum@gmail.com (SM); sfarooq@gudgk.edu.pk (IRN)

<sup>2</sup> Plant Production Department (Horticulture - Medicinal and Aromatic Plants), Faculty of Agriculture (Saba Basha), Alexandria University, Alexandria 21531, Egypt; mohamed\_marie2009@yahoo.com

<sup>3</sup> Department of Plant Sciences, College of Agricultural and Marine sciences, Sultan Qaboos University, Alkhoud, 123, Oman; alsadi@squ.edu.om

<sup>4</sup> Department of Biotechnology, College of Science, Taif University, P.O. Box 11099, Taif 21944, Saudi Arabia, research@bssalj.com (BSA), elshehawi@hotmail.com (AME)

<sup>5</sup> College of Crop Sciences, Fujian Agriculture and Forestry University, Fuzhou, 350001, People's Republic of China

<sup>6</sup> Department of Plant Protection, Faculty of Agriculture, Harran University, Şanlıurfa 63050, Turkey

<sup>7</sup> Department of Land Management, Faculty of Agriculture, Universiti Putra Malaysia, 43400 UPM Serdang, Selangor, Malaysia

\* Correspondence: [ahtraggar@yahoo.com](mailto:ahtraggar@yahoo.com) (AH); [tkz@upm.edu.my](mailto:tkz@upm.edu.my) (AKTZ)

## SUPPLEMENTARY MATERIALS

### Supplementary Figures

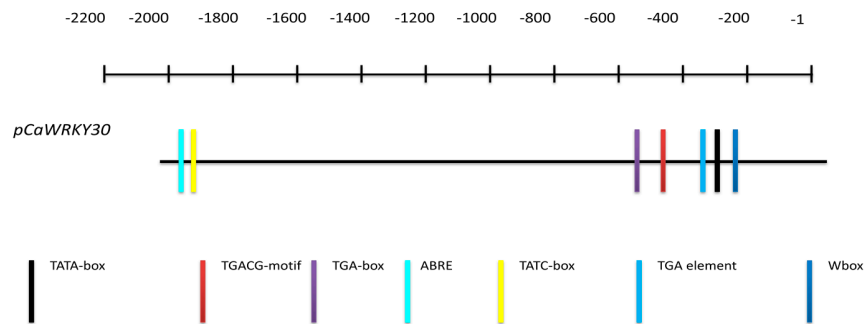

**Supplementary Figure S1. Promoter *cis*-elements analysis of *CaWRKY30***

Wbox: transcription factor WRKY binding element; TGA-element: MeJA-relative element; TATC-box: Salicylic responsive; ABRE: Absciscic acid responsive; TGA-box: Auxin responsive; TGACG-motif; TATA-box

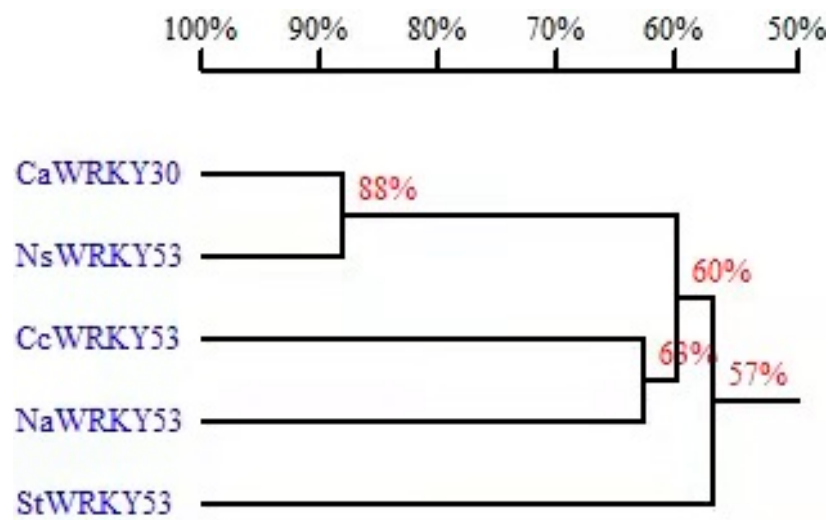

**Supplementary Figure S2. Dendrogram presenting amino acid similarity of *CaWRKY30* and WRKYs from other species**

*CaWRKY30* shares 88%, 60%, 68% and 57% amino acid identities to *NsWRKY53*, *CcWRKY53*, *NaWRKY53* and *StWRKY53*, respectively.

**Supplementary Table S1. Pepper-specific primers used for construction of the vectors**

| Gene                         | Forward primer (5'-3') | Reverse primer (3'-5') | Size (bP) |
|------------------------------|------------------------|------------------------|-----------|
| <i>CaWRKY30</i> <sup>1</sup> | ATGGATTGTGTTTTACCTGGGA | TCAGCCCACTTTGACCT      | 924       |
| <i>CaWRKY30</i> <sup>2</sup> | ATCCGAGAAGCTATTACAG    | TCTGAGTCTGAATGGTAC     | 364       |
| <i>CaWRKY30</i> <sup>3</sup> | ATGGATTGTGTTTTACCTGGGA | TCAGCCCACTTTGACCT      | 924       |

<sup>1</sup>Primers for full length cloning of *CaWRKY30*

<sup>2</sup>Primers for construction of TRV: *CaWRKY30* vector

<sup>3</sup>Primers for construction of 35S:*CaWRKY30-GFP*

**Supplementary Table S2. Disease index for *Ralstonia* infected pepper plants**

| <b>score</b> | <b>Condition level</b>                                                                          |
|--------------|-------------------------------------------------------------------------------------------------|
| 0            | Capsicum plants are normal and asymptomatic at 0.                                               |
| 1            | Plants with slight withering, the basal 1-2 leaves withered, the top of pepper plant is normal. |
| 2            | Leaves in addition to the top leaves, 1: 2 leaves withered, the top of pepper plant is normal.  |
| 3            | 2/3 of the leaves of pepper plant withered while top pepper plant is normal.                    |
| 4            | Most of the leaves were withered including the top leaves                                       |
| 5            | Whole plant was withered or dead.                                                               |

**Supplementary Table S3. Primers used in Real time RT PCR analyses**

| Gene                        | Accession number | Forward primers (5'-3')            | Reverse primers(3'-5')             | Size (bp) |
|-----------------------------|------------------|------------------------------------|------------------------------------|-----------|
|                             | CA01g3448        |                                    |                                    |           |
| <i>CaWRKY30<sup>1</sup></i> | 0                | CACAGGGAGAGGATTGA                  | GTAACCTCGCGACAAGT                  | 219       |
| <i>CaPR1</i>                | AF348141.1       | GCCGTGAAGATGTGGGTCAATGA            | TGAGTTACGCCAGACTACCTGAGTA          | 108       |
| <i>CaNPR1</i>               | X61679.1         | ACTTCTTCGCCGACGCCAAG               | GCCAACACATTACACCAGAGCATC           | 190       |
| <i>CaDEF1</i>               | AF442388         | GTGAGGAAGAAGTTTGAAAGAAA<br>GTAC    | TGCACAGCACTATCATTGCATACAAT<br>TC   | 267       |
| <i>CaHIR1</i>               | AAX20040         | CCTGCAATGTTTGCTCATTGAC             | CATGGGAATCGTTGATCTTAATC            | 164       |
| <i>CaABR1</i>               | CA524559         | ATGACAGGCACAACAGAAGAAAA<br>T       | AATAAGTTATGACAGAGCCATTTT           | 148       |
| <i>CaActin</i>              | GQ339766         | AGGGATGGGTCAAAAGGATGC              | GAGACAACACCGCCTGAATAGC             | 225       |
| <i>18srRNA</i>              | EF564281         | CCGGTCCGCCTATGGTGTGCACCG<br>GTCGTC | GCAGTTGTTCTGCTTTCATAAATCCAA<br>GAA | 285       |
| <i>CaWRKY6</i>              | KF736800         | GGTAGCTAGACAATTATGCTGC             | CAAAAAAAAAATCTTATCAACTTG           | 142       |
| <i>CaWRKY22</i>             | CA08g07730       | GAGGCTGCACAGCTAGTTCCA<br>C         | CACCAAGAACAGAGAGGGG                | 162       |
| <i>CaWRKY27</i>             | DQ102364.1       | CTGAGCAAGATGATTCCGAGAA             | ATTGGCACTGACACCACTCT               | 148       |
| <i>CaWRKY40</i>             | AAX20040.1       | AAGTCCAGCAGAGCAGTCAA               | AACAATTGTCTAAGCCATCCG              | 152       |

<sup>1</sup>Specific primers to detect relative expression of *CaWRKY30* designed according to the sequence of 3'UTR

Specific primers for marker genes
